# Supplementary material
Source: PubMed Central journal article supplement (PMC5061451)
Supplement: NIHMS805670-supplement-Supp_info.pdf [file NIHMS805670-supplement-Supp_info.pdf]

SUPPORTING INFORMATION FOR:

## **A hybrid NMR/SAXS-based approach for discriminating oligomeric protein interfaces using Rosetta**

Paolo Rossi<sup>†</sup>, Lei Shi<sup>‡</sup>, Gaohua Liu<sup>†</sup>, Christopher M. Barbieri<sup>†</sup>, Hsiau-Wei Lee<sup>‡</sup>, Thomas D. Grant<sup>§§</sup>, Joseph R. Luft<sup>§§</sup>, Rong Xiao<sup>†</sup>, Thomas B. Acton<sup>†</sup>, Edward H. Snell<sup>§§</sup>, Gaetano T. Montelione<sup>†#</sup>, David Baker<sup>‡</sup>, Oliver F. Lange<sup>‡</sup>, Nikolaos G. Sgourakis<sup>&</sup>

<sup>†</sup>Department of Molecular Biology and Biochemistry, Center for Advanced Biotechnology and Medicine, and Northeast Structural Genomics Consortium, Rutgers University, Piscataway, NJ 08854, U.S.A.

<sup>‡</sup>Department of Biochemistry, University of Washington, Seattle, WA 98195, U.S.A.

<sup>‡</sup>Departments of Chemistry and Biochemistry & Molecular Biology, Complex Carbohydrate Research Center, University of Georgia, Athens, GA, and Northeast Structural Genomics Consortium 30602, U.S.A.

<sup>§</sup>Hauptman–Woodward Medical Research Institute, and Northeast Structural Genomics Consortium Buffalo, NY 14203, U.S.A.

<sup>§</sup>SUNY Buffalo Department of Structural Biology, Buffalo, NY 14203, U.S.A.

<sup>#</sup>Department of Biochemistry, Robert Wood Johnson Medical School, Rutgers, The State University of New Jersey, Piscataway, NJ 08854, U.S.A.

<sup>‡</sup>Howard Hughes Medical Institute, University of Washington, Seattle, WA 98195, U.S.A

Present addresses: <sup>&</sup>Laboratory of Chemical Physics, National Institute of Diabetes and Digestive and Kidney Diseases, National Institutes of Health, Bethesda, MD 20892, USA

## Table of Contents

|                                                                                            |           |
|--------------------------------------------------------------------------------------------|-----------|
| <b>Supplementary Methods .....</b>                                                         | <b>3</b>  |
| <b>Sample preparation .....</b>                                                            | <b>3</b>  |
| <b>NMR spectroscopy and resonance assignments.....</b>                                     | <b>3</b>  |
| <b>Rosetta structure calculation and analysis .....</b>                                    | <b>5</b>  |
| <b>Small angle X-ray Scattering (SAXS) .....</b>                                           | <b>6</b>  |
| <b>Analytical ultracentrifugation .....</b>                                                | <b>7</b>  |
| <b>Software use (command lines).....</b>                                                   | <b>8</b>  |
| <b>Supplementary Tables .....</b>                                                          | <b>13</b> |
| <b>Table S1. Aha1 SAXS data collection summary. ....</b>                                   | <b>13</b> |
| <b>Table S2. Summary of NMR Structural Statistics for Aha1 ensemble.<sup>a</sup> .....</b> | <b>14</b> |
| <b>Table S3. Aha1 Assigned Experimental Interchain NOEs.<sup>a</sup> .....</b>             | <b>15</b> |
| <b>Supplementary Figures.....</b>                                                          | <b>16</b> |
| <b>Figure S1. Static light scattering results for Aha1 (CsR251). ....</b>                  | <b>16</b> |
| <b>Figure S2. Sedimentation velocity analysis of Aha1.....</b>                             | <b>17</b> |
| <b>Figure S3. Concentration dependence of sedimentation equilibrium for Aha1. ....</b>     | <b>18</b> |
| <b>Figure S4. Analysis of experimental SAXS data and model fits.....</b>                   | <b>19</b> |
| <b>Figure S5. Two dimensional HSQC spectra.....</b>                                        | <b>20</b> |
| <b>Figure S6. NMR chemical shifts connectivity map.....</b>                                | <b>21</b> |
| <b>Figure S7. 1D <sup>15</sup>N T1 and T2 relaxation data.....</b>                         | <b>23</b> |
| <b>Figure S8. Comparison of alternative Phase II dimer conformations.....</b>              | <b>24</b> |
| <b>Figure S9. Final hybrid structural ensemble .....</b>                                   | <b>26</b> |
| <b>References.....</b>                                                                     | <b>27</b> |

## Supplementary Methods

### Sample preparation

The Aha1 protein from *Colwellia psychrerythraea* including a C-terminal His<sub>6</sub> tag (LEHHHHHH), was cloned, expressed, and purified following standard protocols of the Northeast Structural Genomics Consortium (NESG) in order to prepare [U-<sup>13</sup>C,<sup>15</sup>N]- and [U-5%-<sup>13</sup>C,100%-<sup>15</sup>N]-Aha1 samples for NMR spectroscopy<sup>1</sup>. Briefly, the 146-residue coding sequence of the gene locus CPS\_1688 of *Colwellia psychrerythraea* (UniProtKB/TrEMBL ID, Q484T9\_COLP3; NESG ID, CsR251; hereafter referred to as Aha1) was cloned into pET21\_NESG vector containing a C-terminal His<sub>6</sub> affinity tag (LEHHHHHH) to yield the plasmid CsR251-21.1 (deposited into the PSI Materials Repository; <http://psimr.asu.edu/>). The triple-labeled with the methyl groups of Val, Leu, Ile ( $\delta$ 1) selectively protonated, {[U-<sup>2</sup>H,<sup>13</sup>C,<sup>15</sup>N]; Ile $\delta$ 1-[<sup>13</sup>CH<sub>3</sub>]; Leu,Val-[<sup>13</sup>CH<sub>3</sub>]}-Aha1 were prepared using (<sup>15</sup>NH<sub>4</sub>)<sub>2</sub>SO<sub>4</sub> and [U-<sup>13</sup>C]-D-glucose with addition of [U-<sup>13</sup>C<sub>4</sub>, 3,3-<sup>2</sup>H<sub>2</sub>]- $\alpha$ -ketobutyrate (50 mg/L), [U-<sup>13</sup>C<sub>5</sub>, 3-<sup>2</sup>H]- $\alpha$ -ketoisovalerate (CIL Inc.) (100mg/L) in D<sub>2</sub>O medium<sup>2</sup>. The CsR251-21.1 plasmid was transformed into codon-enhanced BL21(DE3) pMGK *Escherichia coli* cells, and cultured in MJ9 minimal medium<sup>3</sup> containing (<sup>15</sup>NH<sub>4</sub>)<sub>2</sub>SO<sub>4</sub> and U-<sup>13</sup>C-glucose as the sole nitrogen and carbon sources. Natural abundance Aha1 was produced in LB media following the identical protocol. Initial cell growth was carried out at 37 °C and protein expression was induced at 17 °C by 1 mM isopropyl- $\beta$ -D-thiogalactopyranoside (IPTG) at mid-log phase growth. Expressed proteins were purified using an ÄKTAexpress™ (GE Healthcare) two-step protocol consisting of HisTrap HP affinity chromatography followed directly by HiLoad 26/60 Superdex 75 gel filtration chromatography. The final yield of purified isotopically enriched Aha1 was approximately 20 mg/L of culture. Samples of [U-<sup>13</sup>C,<sup>15</sup>N]-, {[U-<sup>2</sup>H,<sup>13</sup>C,<sup>15</sup>N]; Ile $\delta$ 1-[<sup>13</sup>CH<sub>3</sub>]; Leu,Val-[<sup>13</sup>CH<sub>3</sub>]}-, and [U-5%-<sup>13</sup>C,100%-<sup>15</sup>N]-Aha1 for NMR spectroscopy were concentrated by centrifugation to 1.3, 0.7 and 1.1 mM, respectively, in 10 mM TRIS-HCl, 100 mM NaCl, 5 mM DTT, 50  $\mu$ M DSS, 10% <sup>2</sup>H<sub>2</sub>O at pH 7.5. Sample purity and molecular mass were confirmed by SDS-PAGE and MALDI-TOF mass spectrometry.

[U-5%-<sup>13</sup>C,100%-<sup>15</sup>N]-Aha1 was first aligned in 12.5 mg/mL Pf1 phage medium (ASLA biotech<sup>4</sup>). For the second set of residual dipolar couplings, the protein was aligned in 4.2 % C<sub>12</sub>E<sub>5</sub> polyethylene glycol bicelles (PEG, Sigma Aldrich) using previously published protocols<sup>5</sup>.

### NMR spectroscopy and resonance assignments

All NMR data were collected at 25 °C on Bruker AVANCE 800 MHz and Varian INOVA 600 MHz spectrometers equipped with 5-mm cryoprobes, processed with NMRPipe<sup>6</sup> and visualized using SPARKY<sup>7</sup>;

chemical shift referencing is conducted with 50  $\mu\text{M}$  DSS internal standard and the assigned  $\text{C}\alpha$ ,  $\text{C}\beta$  and  $\text{C}'$  CS were adjusted for  $^2\text{H}$  shift using TALOS+<sup>8</sup>. First, backbone and selectively protonated methyls were assigned using a  $\{[\text{U-}^2\text{H}, ^{13}\text{C}, ^{15}\text{N}]; \text{Ile}\delta 1\text{-}[^{13}\text{CH}_3]; \text{Leu,Val-}[^{13}\text{CH}_3]\}$ -Aha1 sample and the data acquisition and processing strategies follow the previously published work by Lange, Rossi and co-workers<sup>9</sup>. Additional assignments were determined manually starting from the existing triple labeled assignments using two complementary 3D HCCH-TOCSY experiments, with the chemical shift of  $^1\text{H}$  and  $^{13}\text{C}$  indirectly recorded respectively, and 3D  $^{13}\text{C}$ - and  $^{15}\text{N}$ -edited NOESY spectra acquired on a  $[\text{U-}^{13}\text{C}, ^{15}\text{N}]$ -Aha1 with initially simulated peak lists following a previously published strategy of Liu and coworkers<sup>10</sup>. The complete initial NOESY peak list were simulated from the existing triple labeled assignments for assigned atoms and averaged chemical shifts from the BioMagResBank (BMRB) for all remaining assignable side-chain resonances. Stereospecific isopropyl methyl assignments for all Val and Leu residues were deduced from characteristic cross-peak fine structures in high resolution 2D  $^1\text{H}$ - $^{13}\text{C}$  HSQC spectra of  $[\text{U-}5\%\text{-}^{13}\text{C}, 100\%\text{-}^{15}\text{N}]$ -Aha1<sup>11</sup>. Complete datasets that include  $^1\text{H}$ ,  $^{13}\text{C}$ , and  $^{15}\text{N}$  resonance assignments, raw FIDs, and peak lists for *C. psychrerythraea* Aha1 were deposited in BMRB (BMRB ID 19235). Dynamics and oligomerization states of Aha1 were assessed by gradient and sensitivity-enhanced 2D  $\{^1\text{H}\}$  - $^{15}\text{N}$  heteronuclear NOE and 1D  $^{15}\text{N}$   $T_1$  and  $T_2$  relaxation experiments<sup>12</sup>. 3D  $^{13}\text{C}$ - and  $^{15}\text{N}$ -edited NOESY spectra on  $[\text{U-}^{13}\text{C}, ^{15}\text{N}]$ -Aha1 sample were acquired with a mixing time of 120 ms. A 300 ms mixing time was chosen for NOESY acquisitions on  $\{[\text{U-}^2\text{H}, ^{13}\text{C}, ^{15}\text{N}]; \text{Ile}\delta 1\text{-}[^{13}\text{CH}_3]; \text{Leu,Val-}[^{13}\text{CH}_3]\}$ -Aha1 sample.

Automatic NOESY cross-peak assignment and initial structure calculations of monomeric Aha1 units were performed with an automated CYANA 3.0 run<sup>13</sup> as previously described by Lange, Rossi and co-workers<sup>9</sup> using 23 manually determined restraints and carrying two sets of peak lists and chemical shifts assignments from double and triple labeled Aha1 samples. The initial run yielded 3463 upper limit distance restraints per protomer. The initial NOE set was trimmed back to the 1493 long-range ( $|i - j| \geq 5$ ) restraints set and used for the RASREC-Rosetta run. No experimental intermolecular contact information was present prior to Rosetta structure calculations.

For further structure validation, intermolecular protein-protein NOE contacts were obtained using a double half-filtered (3D F1- $^{13}\text{C}/^{15}\text{N}$ -filtered, F3- $^{13}\text{C}$ -edited) NOESY experiment<sup>14</sup> on a 1:1 mixed sample of unlabeled and  $[\text{U-}^{13}\text{C}, ^{15}\text{N}]$ -Aha1 acquired with 120 ms mixing time (Table S3). Assignment of the 3D double half-filtered NOESY was straightforward from the existing sidechain assignments that were highly resolved in the  $^1\text{H}$ - $^{13}\text{C}$  HSQC for the majority of the interchain peaks. All spectra were acquired on the same spectrometer to insure consistent peak positions. Amide backbone one bond  $^1\text{H}$ - $^{15}\text{N}$  residual dipolar coupling (RDC) values ( $^1D_{\text{NH}}$ ) for Aha1 were measured using  $^1J_{\text{NH}}$ -modulated HSQC experiments<sup>15</sup> on isotropic and two partially aligned samples of  $[\text{U-}5\%\text{-}^{13}\text{C}, 100\%\text{-}^{15}\text{N}]$ -Aha1 in Pf1 phage (12.5 mg/mL) and polyethylene glycol bicelles (4.2%) as previously described<sup>45</sup>. A high degree of linear dependence was

obtained for the two RDC datasets, manifested in a correlation coefficient of 0.8 in 5-dimensional tensor space<sup>16</sup>. Dihedral angle predictions were computed using TALOS+<sup>8</sup>.

### **Rosetta structure calculation and analysis**

The ensemble of Aha1 monomeric structures were modeled using the RASREC CS-Rosetta method<sup>17</sup>. In summary, CYANA 3.0 upper distance restraints were first separated into the restraints with highest reliability (SUP = 1), and those with lower reliability (SUP < 1) and then converted into ROSETTA flat-bottom restraints using an exponential penalty function with a variable upper limit<sup>18</sup>. RASREC combines the lower reliability distance restraints into random pairs of ambiguous restraints at the start of each individual structure calculation trajectory. All RASREC stages were terminated as soon as the acceptance rate for new conformers into the structural pool drops below 10%, as described previously<sup>9</sup>.

We applied a penalty term that is proportional to the root-mean square deviation between experimental and calculated RDCs, during Rosetta scoring and gradient-based minimization. For a given structural model and input RDC data, the five alignment tensor parameters were fitted using the non-linear Levenberg-Marquardt algorithm. The three Euler angles that define the orientation of the alignment tensor in the molecular frame were optimized while keeping the axial ( $D_a$ ) and Rhombic component (R) of the alignment tensor fixed. The  $D_a$  and R-values used for peg were 7.4 Hz, 0.33 and for phage 12.7 Hz, 0.18, respectively. These values were estimated from the powder pattern distribution of the RDC data<sup>19</sup>. The contribution of each RDC dataset was weighted according to the inverse of the magnitude of the alignment tensor,  $D_a$ .

The dimeric structure of Aha1 was modeled using the RosettaOligomers<sup>20</sup> protocol that involves Monte-Carlo-based search of the rigid body degrees of freedom using a coarse-grained representation of the system, followed by symmetric, all-atom optimization of the rigid-body, backbone and sidechain degrees of freedom. Briefly, starting from an ensemble of 10 monomeric structures provided by RASREC, we generated 40,000 full-atom conformations using a symmetric docking protocol that samples the 4 rigid-body degrees of freedom that uniquely define a dimer orientation in the molecular frame globally using a low-resolution docking stage followed by symmetric all-atom refinement (phase I). In a first step, we selected the phase I dimer models having the lowest 10% Rosetta energy and 20% interface interaction free energy ( $\Delta\Delta G$  or DDG) (800 models). From this set, we further selected 28 models showing good fits (below the average score values in the full set) to both the RDC and SAXS data that were used as starting structures for additional localized docking calculations, that involve random perturbations of the four rigid-body degrees of freedom, using Gaussian displacements and rotations between the two subunits with a standard deviation of 3 Å and 5°, respectively (phase II). From these runs, conformations having below

75% Rosetta all-atom energy, RDC and SAXS penalty and with solvent exposed surface area (SASA) greater than  $800 \text{ \AA}^2$  were kept for further analysis. Finally, we selected with the top 10 structures according to DDG as the final ensemble. The model with the lowest interface interaction score was used as a reference structure to compute RMS (excluding the flexible C-terminal loops at residues 132-148). A high degree of convergence to the reference structure was obtained, suggesting that the restrained search of conformational space leads to a global minimum in Rosetta's energy landscape (Fig. S8 and Fig. 5). All generated dimer models were further rescored according to an independent dataset of 23 inter-subunit NOEs (Table S3) not applied as calculation restraints, using a flat-bottom potential with a  $5.5 \text{ \AA}$  upper limit and an exponential penalty function. The final 10 Rosetta structures are highly consistent with the intermolecular NOEs as well as all other available NMR and SAXS data (Table S2).

We used a reduced SAXS dataset, consisting of 10% of the original points (this was done by only including every 10th data point from the low-noise region of the experimental profile up to Q values of  $0.35 \text{ \AA}^{-1}$ ) during Rosetta structure calculations. This did not affect model discrimination, but led to a much faster computation of the SAXS score, performed using a coarse-grained representation of the system as described previously. The CRY SOL fits to the experimental SAXS profile in Figures 3, 5, and S8 were carried out using the full experimental dataset.

Additionally, to evaluate the agreement of the dimer orientations observed in the available Xray structures of the bet-V1 superfamily with the NMR and SAXS data, we performed local perturbation calculations (same as phase II above), where conformational sampling is carried out in the vicinity of the rigid-body degrees of freedom extracted from the homologous dimeric structures SSP2350 (PDB ID 3Q6A), MM0500 (PDB ID 1XUV), and MLL2253 (PDB ID 3Q63). The models generated from these calculations were found to be largely inconsistent with the RDC, SAXS and intermolecular NOE data.

Structural statistics and global structure quality scores for Aha1, presented in Table S2, were computed using the PSVS 1.4 software package<sup>21</sup>. The RDC statistics were computed using PALES<sup>22</sup>. The final coordinates (excluding the C-terminal 6-His polypeptide segment) for the ensemble of 10 structures and NMR-derived restraints for Aha1 were deposited to the Protein Data Bank (PDB ID 2M89). All structure diagrams were made using PyMOL ver. 1.4 ([www.pymol.org](http://www.pymol.org)).

### **Small angle X-ray Scattering (SAXS)**

SAXS data were collected on Beamline 4-2 of the Stanford Synchrotron Radiation Lightsource (SSRL)<sup>23</sup>. The data were integrated with SSRL and in-house software Sastools<sup>23</sup> and analyzed using the Primus package<sup>24</sup>. Three protein concentrations were used that were  $\times 0.5$ ,  $\times 0.375$  and  $\times 0.25$  the starting 1.4

mM Aha1 (CsR251) stock solution with eight 1s exposures of each. There was no evidence of radiation damage within each concentration series and no aggregation or concentration dependent effects seen. Twenty independent *ab initio* molecular envelope reconstructions were carried out yielding a mean normalized spatial discrepancy of 0.540 with a variation of 0.023 (Fig. 2). CRY SOL<sup>25</sup> was used to examine the fit to the lowest energy Rosetta structure, a dimer, which gave a  $\chi^2$  of 1.71.

### **Analytical ultracentrifugation**

Analytical ultracentrifugation experiments were carried out in an Optima XL-I ultracentrifuge using an An-50 Ti rotor (Beckman Coulter, Fullerton, CA). Aha1 was equilibrated in a pH 7.5 buffer containing 10 mM Tris, 100 mM NaCl and 2 mM TCEP. Buffer density, buffer viscosity and the partial specific volumes of the proteins were calculated using the program SEDNTERP<sup>26</sup>. All analytical ultracentrifugation experiments were conducted in epon charcoal-filled double-sector centerpieces and quartz windows. Sedimentation velocity (SV) experiments were conducted at 25 °C and the samples were spun at 50,000 rpm using seven different protein concentrations (40, 20, 10, 5, 3, 1.5, and 0.75  $\mu$ M). Protein gradients were monitored using either the interference optical system (40  $\mu$ M Aha1) and at either 280 nm (20 and 10  $\mu$ M Aha1) or 230 nm (5, 3, 1.5, and 0.75  $\mu$ M Aha1) using the optical absorbance system. Approximately 50 SV scans for each protein concentration were fit simultaneously to calculate a  $c(s)$  distribution that was generated using the program SEDPHAT<sup>27</sup>. During the  $c(s)$  analysis, the frictional ratio and meniscus position were treated as floating parameters. After optimization of these parameters, the final distribution was calculated using a resolution setting of 200, in a range from 0-10 Svedberg (resolution 0.05 S, 10/200) a confidence interval of 0.8. For the sedimentation equilibrium (SE) experiments, 4 different protein concentrations (5.0, 2.5, 1.5, and 0.25  $\mu$ M) at three different speeds (15,000, 23,000 and 29,000 rpm) were analyzed at 25 °C, with protein gradients being monitored at both 280 and 230 nm. Profiles of Aha1 were globally fit to a monomer-dimer self-association model using the program SEDPHAT (v 4.0)<sup>27</sup> with the monomer molecular weight fixed at 17550 Da. Error limits, which represent the 95% confidence interval, were determined using F-statistics<sup>28</sup>.

### Software use (command lines)

These command lines are compatible with ROSETTA3 SVN version 51540 [https://svn.rosettacommons.org/source/trunk/rosetta/rosetta\\_source](https://svn.rosettacommons.org/source/trunk/rosetta/rosetta_source). A full description of the use of the program can be found at [www.csrosetta.org](http://www.csrosetta.org)

### Step 1: Generate monomer models from ILV NOE data using RASREC CS-Rosetta protocol.

Please refer to the supporting information in Lange, Rossi et. al.<sup>9</sup> for the exact command lines used to generate models of the monomeric subunit.

### Step 2: Global symmetric docking (Phase I)

```
minirosetta.static.linuxgccrelease \
  -run:protocol symdock \
  -database rosetta_database \
  -symmetry:symmetry_definition C2.symm \
  -symmetry:initialize_rigid_body_dofs \
  -packing:ex1 \
  -packing:ex2aro \
  -use_input_sc \
  -ignore_unrecognized_res \
  -out:nstruct 200 \
  -out:file:silent phaseI.silent \
  -out:file:silent_struct_type binary \
  -out:file:fullatom \
  -use_incorrect_hbond_deriv false \
  -docking:dock_lowres_filter 15.0 20.0 1500.0 \
  -docking:high_min_patch patch_high_min \
  -score:weights score12_full \
  -restore_pre_talaris_2013_behavior \
  -in:file:s monomer_input_rasrec.pdb
```

### Step 3: Local symmetric perturbation with rdcx and saxs

This step starts from selected monomer models from step 2 based on their RDC and SAXS scores (generating sel\_monomer\_from\_global\_docking.pdb)



```

minirosetta.static.linuxgccrelease \
  -run:protocol symdock \
  -database rosetta_database \
  -symmetry:symmetry_definition C2.sym \
  -symmetry:perturb_rigid_body_dofs 3 5 \
  -packing:ex1 \
  -packing:ex2aro \
  -use_input_sc \
  -ignore_unrecognized_res \
  -out:nstruct $1 \
  -out:file:silent phaseII.silent \
  -out:file:silent_struct_type binary \
  -out:file:fullatom \
  -use_incorrect_hbond_deriv false \
  -docking:low_patch patch_rdc_saxs \
  -docking:high_patch patch_rdc_saxs \
  -docking:high_min_patch patch_high_min_rdc_saxs \
  -docking:pack_patch patch_rdc_saxs \
  -docking:dock_lowres_filter 15.0 20.0 1500.0 \
  -docking:kick_relax \
  -default_max_cycles 200 \
  -relax:default_repeats 2 \
  -jump_move true \
  -score:weights score12_full \
  -restore_pre_talaris_2013_behavior \
  -score::patch patch_relax_rdc_saxs \
  -rdc:fit_method nls \
  -in::file::rdc_rdc_medium1.txt rdc_medium2.txt \
  -rdc::fix_normAzz 0.001 0.001 \
  -residues:patch_selectors CENTROID_HA \
  -score:saxs:ref_spectrum saxs_sparse.dat \
  -in:file:s_sel_monomer_from_phaseI.pdb

```

Inspection of the DDG, Rosetta energy and SAXS and RDC score terms in the phase I/phase II output models can be performed by extracting the score lines from the silent output file: eg. `grep SCORE: phaseI.out > scores.txt`

***Patch files***

Patch files are used to set weights of the score function. Four different patch files are used to control sampling (low resolution, all atom) and selection into the pool of structures.

```
==> patch_high_min<==
```

```
fa_rep *= 4.22
```

```
==> patch_rdc_saxs <==
```

```
rdc = 20.0
```

```
fastsaxs = 1.0
```

```
==> patch_high_min_rdc_saxs <==
```

```
rdc = 20.0
```

```
fastsaxs = 1.0
```

```
fa_rep *= 4.22
```

```
==> patch_relax_rdc_saxs <==
```

```
rdc = 10.0
```

```
fastsaxs = 0.05
```

*Symmetry definition files*

==> C2.symm <==

symmetry\_name paolo\_dimer\_\_2

E = 2\*VRT0\_base + 1\*(VRT0\_base:VRT1\_base)

anchor\_residue 93

virtual\_coordinates\_start

xyz VRT0 -0.9971370,0.0568482,0.0498606 -0.0569190,-0.9983788,0.0000000 14.2107039,-4.3937104,-0.3663004

xyz VRT0\_base -0.9971370,0.0568482,0.0498606 -0.0569190,-0.9983788,0.0000000 26.1198784,-5.0726689,-0.9618041

xyz VRT1 0.9971370,-0.0568482,-0.0498606 -0.0756160,-0.7488722,-0.6583864 14.2107039,-4.3937104,-0.3663004

xyz VRT1\_base 0.9971370,-0.0568482,-0.0498606 -0.0756160,-0.7488722,-0.6583864 2.3015295,-3.7147518,0.2292032

xyz VRT 1.0000000,0.0000000,0.0000000 0.0000000,1.0000000,0.0000000 15.2107039,-4.3937104,-0.3663004

virtual\_coordinates\_stop

connect\_virtual JUMP0\_to\_com VRT0 VRT0\_base

connect\_virtual JUMP0\_to\_subunit VRT0\_base SUBUNIT

connect\_virtual JUMP1\_to\_com VRT1 VRT1\_base

connect\_virtual JUMP1\_to\_subunit VRT1\_base SUBUNIT

connect\_virtual JUMP0 VRT VRT0

connect\_virtual JUMP1 VRT0 VRT1

set\_dof JUMP0\_to\_com x(11.9433682565431) angle\_x

set\_dof JUMP0\_to\_subunit angle\_x(0:360) angle\_y(0:360) angle\_z(0:360)

set\_jump\_group JUMPGROUP2 JUMP0\_to\_com JUMP1\_to\_com

set\_jump\_group JUMPGROUP3 JUMP1\_to\_subunit JUMP0\_to\_subunit

***Data files***

For each input data, we only print the first 10 lines each to familiarize readers with the file-format.

==> rdc\_medium1.txt <==

```
3 H 3 N 9.279
151 H 151 N 9.279
7 H 7 N 0.396
155 H 155 N 0.396
15 H 15 N 8.252
163 H 163 N 8.252
16 H 16 N 15.043
164 H 164 N 15.043
17 H 17 N 12.097
165 H 165 N 12.097
```

==> rdc\_medium2.txt <==

```
3 H 3 N 10.360
151 H 151 N 10.360
7 H 7 N -16.609
155 H 155 N -16.609
15 H 15 N 18.553
163 H 163 N 18.553
16 H 16 N 24.677
164 H 164 N 24.677
17 H 17 N 23.681
165 H 165 N 23.681
```

==> saxs\_sparse.txt <==

```
0.00771096 7554.24 70.6635
0.017006 7253.15 9.33698
0.0263011 6830.58 7.28595
0.0355961 6285.76 6.17379
0.0448912 5670.72 5.27
0.0541862 4985.43 4.56433
0.0634813 4285.38 3.83601
0.0727763 3587.02 3.27892
0.0820714 2926.51 2.97787
```

## Supplementary Tables

**Table S1. Aha1 SAXS data collection summary.**

|                                             |                    |
|---------------------------------------------|--------------------|
| <b>Data Collection parameters</b>           |                    |
| Instrument                                  | SSRL beamline 4-2  |
| Beam geometry                               | Slit               |
| Wavelength                                  | 1.13               |
| q range                                     | 0.008-0.531        |
| Exposure time (s)                           | 1 (x8) for 3 concs |
| Concentration range (mM)                    | 0.25-0.50 × 1.4    |
| Temperature (°C)                            | 18                 |
| <b>Structural parameters</b>                |                    |
| $R_g$ from P(r)                             | 20.2               |
| $R_g$ from Guinier                          | 20.5               |
| $D_{max}$                                   | 62.65              |
| Porod volume estimate                       | 56,560             |
| Dry volume estimated from sequence          | 21,231             |
| <b>Molecular-mass determination</b>         |                    |
| Molecular mass Mr from Porod (kDa)          | 35.35              |
| Calculated monomeric Mr from sequence (kDa) | 17.55              |
| <b>Software employed</b>                    |                    |
| Primary data reduction                      | Sastool            |
| Data processing                             | Primus             |
| <i>Ab initio</i> analysis                   | Dammif             |
| Validation and averaging                    | Damaver            |
| Computation of model intensities            | Crysol             |

**Table S2. Summary of NMR Structural Statistics for Aha1 ensemble.<sup>a</sup>**

|                                                                   |             |
|-------------------------------------------------------------------|-------------|
| <b>Completeness of resonance assignments<sup>b</sup></b>          | <b>Aha1</b> |
| Backbone (%)                                                      | 92          |
| Side chain (%)                                                    | 77          |
| Aromatic (%)                                                      | 48          |
| Stereospecific methyl (%)                                         | 100         |
| <b>Conformationally-restricting restraints<sup>c</sup></b>        |             |
| NOE restraints                                                    |             |
| Total                                                             | 1483        |
| Intra-residue ( $i = j$ )                                         | 0           |
| Sequential ( $ i - j  = 1$ )                                      | 0           |
| Medium range ( $1 <  i - j  < 5$ )                                | 0           |
| Long range ( $ i - j  \geq 5$ )                                   | 1483        |
| NOE restraints / residue                                          | 10          |
| Interchain protein/protein NOEs <sup>d</sup>                      | 23          |
| NH RDC restraints (PEG/Phage)                                     | 78/91       |
| Number of restraints / residue (total / long range)               | 1662/1483   |
| <b>Residual constraint violations<sup>c</sup></b>                 |             |
| Average distance restraint violations / structure                 |             |
| 0.1 - 0.2 Å                                                       | 20.0        |
| 0.2 - 0.5 Å                                                       | 5.1         |
| > 0.5 Å                                                           | 0.0         |
| Average RMS of distance violation / restraint (Å)                 | 0.14        |
| Maximum distance violation (Å)                                    | 0.49        |
| <b>Model Quality<sup>c</sup></b>                                  |             |
| RMSD from average coordinates (Å)                                 |             |
| All Backbone atoms (ordered/all)                                  | 0.6/0.6     |
| All Heavy atoms (ordered/all)                                     | 0.7/0.7     |
| RMSD Bond lengths (Å)                                             | 0.018       |
| RMSD Bond angles (°)                                              | 1.3         |
| Molprobit Ramachandran plot <sup>e</sup>                          |             |
| Most favored regions (%)                                          | 96.1        |
| Additionally allowed regions (%)                                  | 3.5         |
| Disallowed regions (%)                                            | 0.3         |
| Global quality scores (Raw / Z-score) <sup>c</sup>                |             |
| Verify3D                                                          | 0.47/0.16   |
| ProsaII                                                           | 0.55/-0.22  |
| Procheck G-factor ( $\phi, \psi$ ) <sup>e</sup>                   | -0.23/-0.59 |
| Procheck G-factor (all dihedrals) <sup>e</sup>                    | 0.08/0.47   |
| MolProbity clashscore                                             | 1.48/1.27   |
| <b>Residual Dipolar Couplings (RDC) Scores<sup>f</sup></b>        |             |
| Q-factor (PEG/Phage)                                              | 0.23/0.13   |
| R (PEG/Phage)                                                     | 0.16/0.09   |
| <b>Small Angle X-ray scattering (SAXS) Validation<sup>g</sup></b> |             |
| $\chi^2$                                                          | 1.71        |

<sup>a</sup> Structural statistics were computed for the ensemble of 10 deposited structures (PDB ID 2M89)

<sup>b</sup> Computed for residues 1-148, using the AVS software<sup>29</sup>. Resonances that were not included were exchangeable protons (N-terminal  $\text{NH}_3^+$ , Lys  $\text{NH}_3^+$ , Arg  $\text{NH}_2$ , Cys SH, Ser/Thr/Tyr OH) and Pro N, C-terminal carbonyl, side chain carbonyl and non-protonated aromatic carbons.

<sup>c</sup> Calculated for protein using the PSVS 1.4 program<sup>21</sup>. Average distance constraints were calculated using the sum of  $r^{-6}$ .

<sup>d</sup> Not used during Rosetta structure calculation. Used only for validation of the models.

<sup>e</sup> Ordered residue ranges [ $S(\phi) + S(\psi) > 1.8$ ]: 1-134 (chain A), 1-134 (chain B). Secondary structure elements: 2-10 ( $\beta 1, \beta 1'$ ), 34-36 ( $\beta 2, \beta 2'$ ), 44-48 ( $\beta 3, \beta 3'$ ), 55-62 ( $\beta 4, \beta 4'$ ), 66-72 ( $\beta 5, \beta 5'$ ), 83-90 ( $\beta 6, \beta 6'$ ), 95-104 ( $\beta 7, \beta 7'$ ), 14-22 ( $\alpha 1, \alpha 1'$ ), 24-27 ( $\alpha 2, \alpha 2'$ ), 109-130 ( $\alpha 3, \alpha 3'$ ).

<sup>f</sup> RDC quality scores<sup>30</sup> averaged over 10 lowest energy Aha1 Rosetta structures.

<sup>g</sup> SAXS validation score for lowest energy Aha1 Rosetta structure computed with Crysol<sup>25</sup>.

**Table S3. Aha1 Assigned Experimental Interchain NOEs.<sup>a</sup>**

| Assigned Interchain atoms |         |      |         |         |      | upl [Å] |
|---------------------------|---------|------|---------|---------|------|---------|
| Chain A                   |         |      | Chain B |         |      |         |
| Number                    | Residue | Atom | Number  | Residue | Atom |         |
| 6                         | His     | HA   | 116     | Thr     | HG2  | 5.50    |
| 8                         | Ile     | HD1  | 116     | Thr     | HG2  | 5.50    |
| 116                       | Thr     | HG2  | 6       | His     | HA   | 5.50    |
| 116                       | Thr     | HG2  | 8       | Ile     | HD1  | 5.50    |
| 116                       | Thr     | HA   | 119     | Ala     | HB   | 5.50    |
| 116                       | Thr     | HG2  | 122     | Leu     | HG   | 5.50    |
| 116                       | Thr     | HG2  | 123     | Leu     | HG   | 5.50    |
| 116                       | Thr     | HG2  | 123     | Leu     | HD2  | 5.50    |
| 119                       | Ala     | HB   | 119     | Ala     | HB   | 5.50    |
| 119                       | Ala     | HB   | 116     | Thr     | HA   | 5.50    |
| 119                       | Ala     | HB   | 120     | Val     | HG2  | 5.50    |
| 120                       | Val     | HG1  | 123     | Leu     | HD2  | 5.50    |
| 120                       | Val     | HG2  | 123     | Leu     | HD2  | 5.50    |
| 120                       | Val     | HG1  | 123     | Leu     | HD1  | 5.50    |
| 120                       | Val     | HG2  | 123     | Leu     | HD1  | 5.50    |
| 120                       | Val     | HG2  | 119     | Ala     | HB   | 5.50    |
| 122                       | Leu     | HG   | 116     | Thr     | HG2  | 5.50    |
| 123                       | Leu     | HD1  | 120     | Val     | HG1  | 5.50    |
| 123                       | Leu     | HD1  | 120     | Val     | HG2  | 5.50    |
| 123                       | Leu     | HD2  | 120     | Val     | HG1  | 5.50    |
| 123                       | Leu     | HD2  | 120     | Val     | HG2  | 5.50    |
| 123                       | Leu     | HD2  | 116     | Thr     | HG2  | 5.50    |
| 123                       | Leu     | HG   | 116     | Thr     | HG2  | 5.50    |

<sup>a</sup>The intermolecular distances listed are based on manually assigned peaks (chain A→B and symmetric B→A). A qualitative 5.50 Å upper limit distance was used to determine the restraint scores shown in Figure 5. These NOE derived distance restraints were not yet available when the structure was solved, and thus were not used during the structure calculation.

## Supplementary Figures

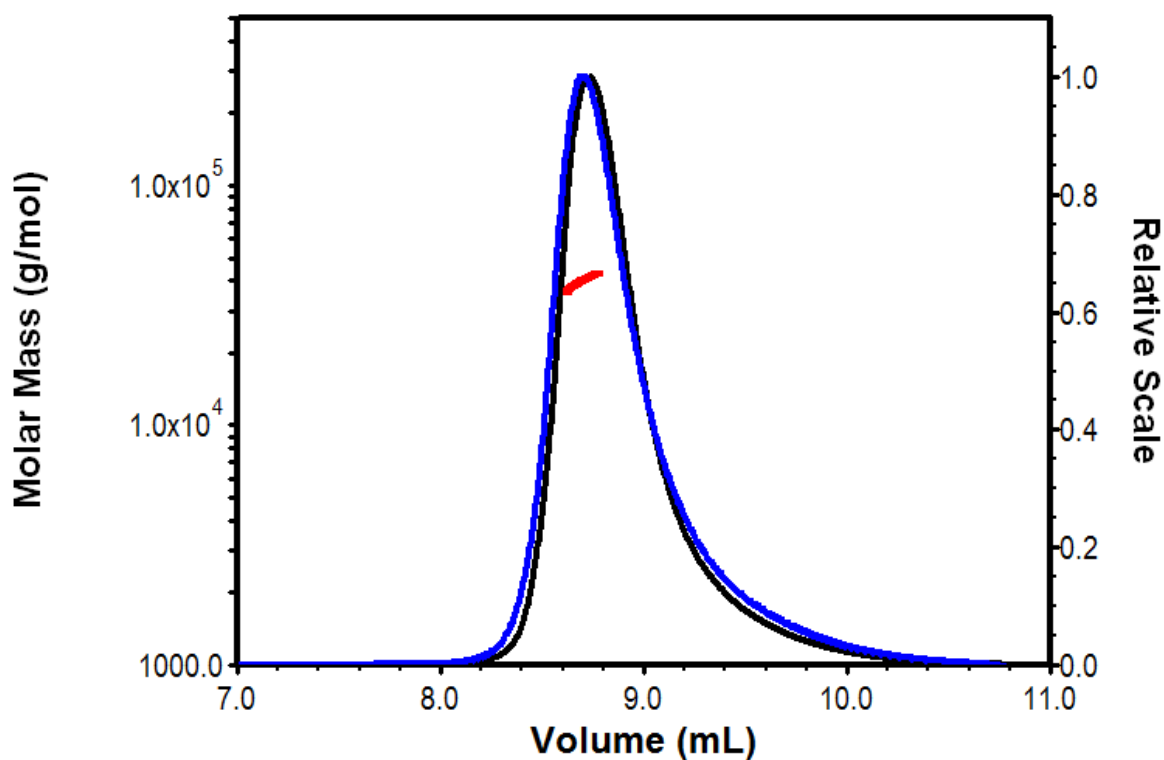

**Figure S1. Static light scattering results for Aha1 (CsR251).**

The NMR sample (30 ml) of [U-5%<sup>13</sup>C-100%<sup>15</sup>N]-Aha1 at 10 mM Tris-HCl (pH 7.5), 100 mM NaCl, 5 mM DTT, 1X Proteinase Inhibitors, 5% D<sub>2</sub>O was injected onto an analytical gel-filtration column (Protein KW-802.5, Shodex, Japan) with the effluent monitored by refractive index (black trace, Optilab rEX) and 90° static light-scattering (blue trace; miniDAWN TREOS, Wyatt Technology) detectors. The resulting experimental molecular weight of isotopically labeled Aha1 is 40.3 kDa (red), the expected Aha1 molecular weight including affinity tag is 17.8 kDa.



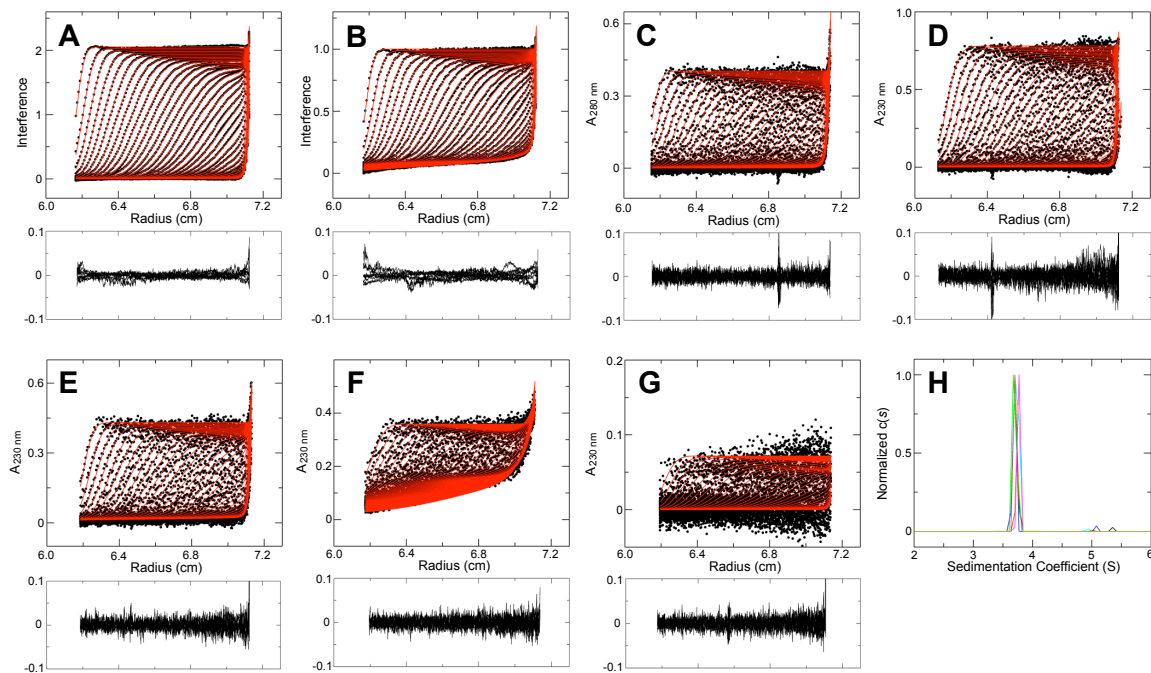

**Figure S2. Sedimentation velocity analysis of Aha1.**

**A-G** Interference (A and B), absorbance at 280 nm (C), and absorbance at 230 nm (D-G) across the centripetal field for solutions of 40, 20, 10, 5, 3, 1.5, and 0.75  $\mu\text{M}$  of Aha1, respectively. Data recorded in 1 min intervals. For clarity of presentation only every fifth point is plotted. Residuals are shown in bottom panels. **H**) Normalized  $c(s)$  distribution plots each depicting a single sedimenting species of  $39 \pm 3$  kDa generated from the plots A-G, respectively. Data generated from 40, 20, 10, 5, 3, 1.5, and 0.75  $\mu\text{M}$  of Aha1 are indicated by black, red, green, blue, cyan, magenta, and dark yellow, respectively.

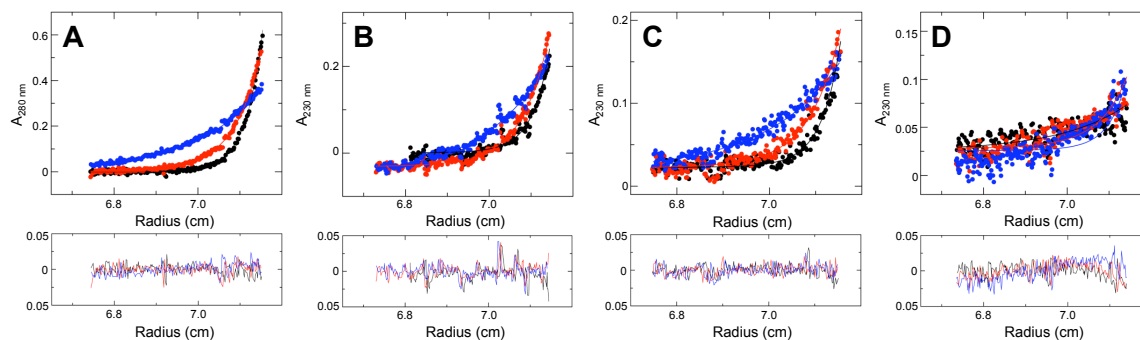

**Figure S3. Concentration dependence of sedimentation equilibrium for Aha1.**

**A-D)** Absorbance at 280 nm (A) or 230 nm (B-D) at equilibrium across the centripetal field for solutions of 4, 2, 1 and 0.25  $\mu\text{M}$  Aha1 (A-D respectively). The black, red, blue circles represent data collected at 15,000, 23,000 and 29,000 rpm, respectively. For clarity only every third measured point is plotted. Fitted lines represent the global best fit of the data to a model for a monomer to dimer equilibrium with the upper limit for the dimerization constant ( $K_D$ ) being 80 nM. Residuals are shown in bottom panels.

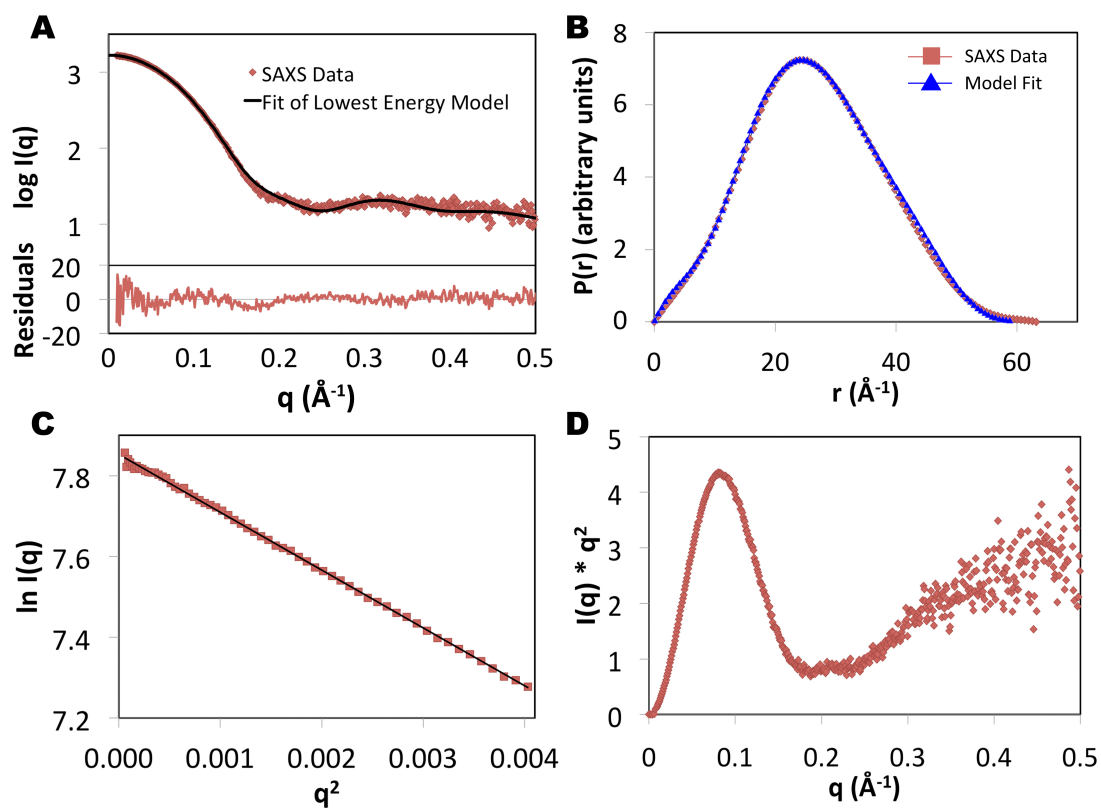

**Figure S4. Analysis of experimental SAXS data and model fits.**

**A)** The calculated fit to the lowest energy Rosetta structure (black line,  $\chi^2 = 1.71$ ) overlaid onto the experimental SAXS data (red squares). The residuals of the fit are shown in the bottom panel. **B)**  $P(r)$  distributions (histogram of interatomic scattering vectors) derived from the raw data (red) versus model fitted values (blue). **C)** Guinier plot (showing no aggregation). **D)** Kratky plot demonstrating that Aha1 is folded in solution.

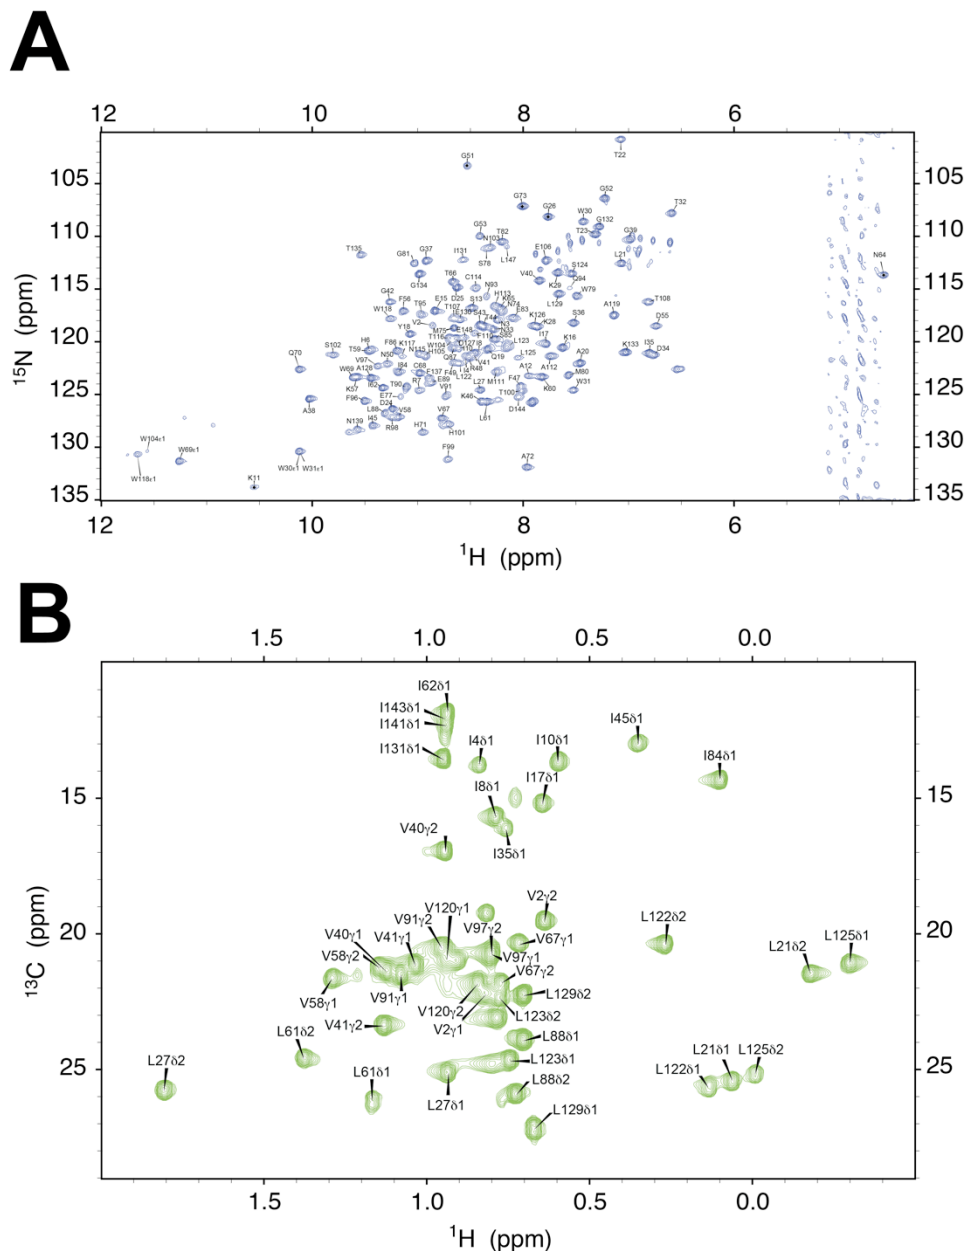

**Figure S5. Two-dimensional HSQC spectra.**

**A)**  $^1\text{H}$ - $^{15}\text{N}$  and **B)**  $^1\text{H}$ - $^{13}\text{C}$  HSQC spectra of *C. psychrerythraea* {[U- $^2\text{H}$ ,  $^{13}\text{C}$ ,  $^{15}\text{N}$ ]; Ile $\delta$ 1-[ $^{13}\text{CH}_3$ ]; Leu, Val-[ $^{13}\text{CH}_3$ ]}-Aha1 in 10 mM Tris, 100 mM NaCl, 5 mM DTT, 50 mM DSS, 90%  $\text{H}_2\text{O}$  / 10%  $^2\text{H}_2\text{O}$ , pH 7.5 buffer collected at 25 °C on a Bruker AVANCE 800 MHz spectrometer. Backbone amide, side chain resonances of Trp as well as selectively protonated Ile, Leu and Val methyls are labeled with one-letter amino acid codes followed by their sequence numbers.

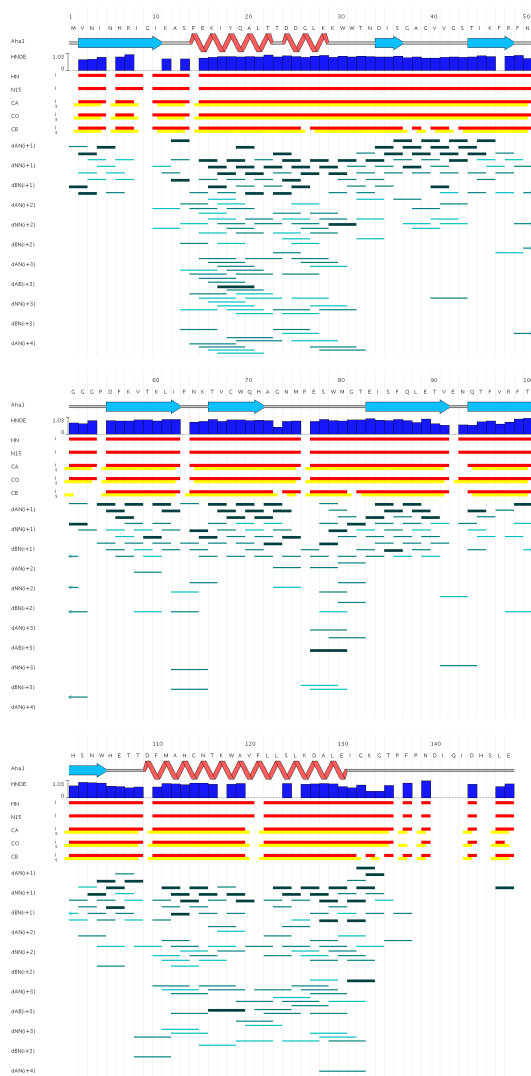

**Figure S6. NMR chemical shifts connectivity map.**

NMR Chemical shift are used to determine resonance assignments and secondary structure for Aha1 (BMRB ID 19235). The final six unassigned histidines in the C-terminal tag have been omitted. Intraresidue (i) and sequential (s) connectivities and sequential  $C'$ ,  $C^\alpha$ , and  $C^\beta$  resonances are shown as horizontal red and yellow lines, respectively. The complete inter-residue CYANA-derived NOE connectivities are shown as thin, medium, and thick black lines, corresponding to weak, medium, and strong NOE interactions. Bar graphs of  $\{^1\text{H}\}$ - $^{15}\text{N}$  heteronuclear NOE data is shown in blue. The secondary structural elements in the final Aha1 NMR structure (PDB ID 2M89) are also shown.

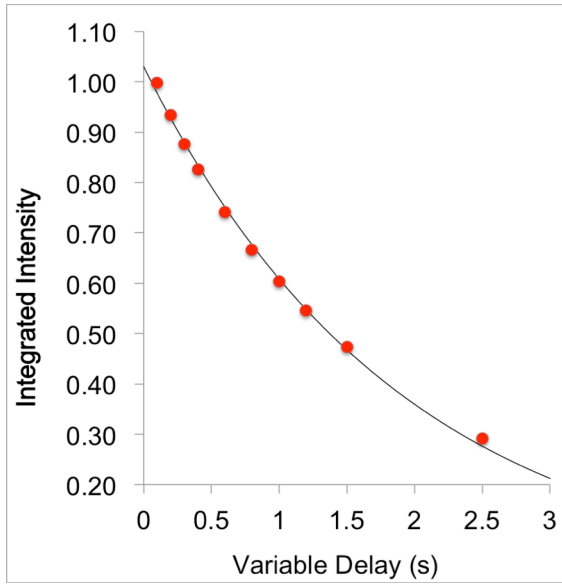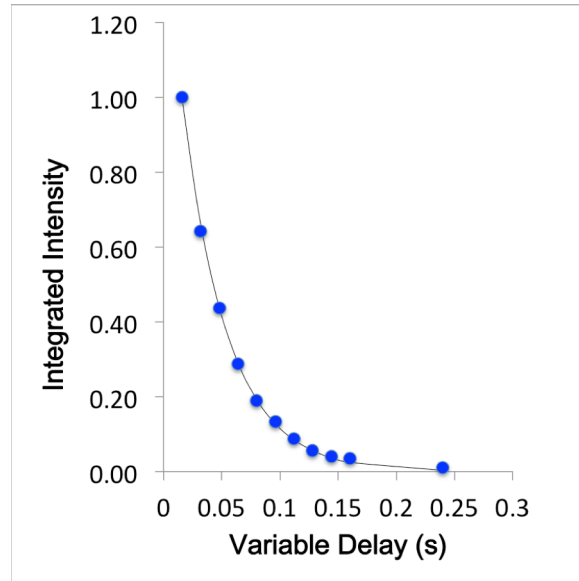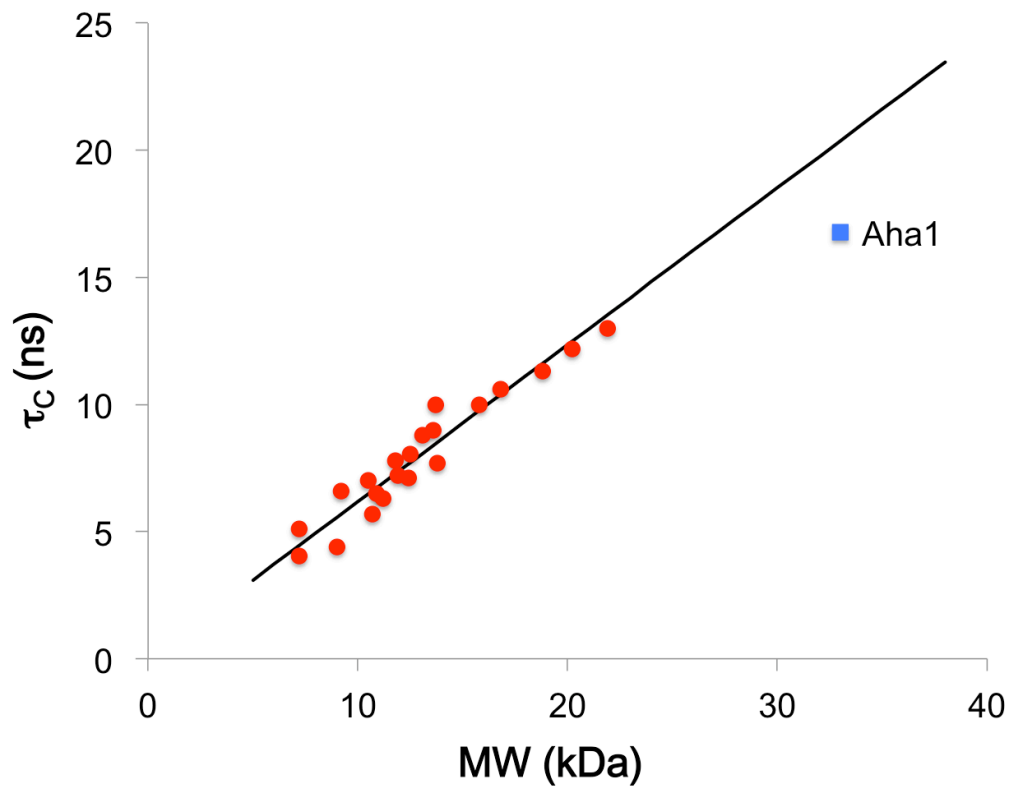

**Figure S7. Backbone amide  $^{15}\text{N}$   $T_1$  and  $T_2$  relaxation data.**

1D  $^{15}\text{N}$   $T_1$  and  $T_2$  relaxation data for *C. psychrerythraea* [U-5% $^{13}\text{C}$ , $^{15}\text{N}$ ]-Aha1. Data were acquired on a Bruker AVANCE 800 MHz spectrometer at 25 °C using pseudo-2D  $^{15}\text{N}$   $T_1$  and  $T_2$  gradient experiments<sup>12</sup>.  $T_1$  spectra were acquired with variable delays ranging from 0.05 to 2.5 s and a relaxation delay of 5 s.  $T_2$  spectra were acquired with CPMG time ranging from 16 to 240 ms and a relaxation delay of 1.5 s. (Top):  $^{15}\text{N}$   $T_1$  and  $T_2$  values were extracted by plotting the decay of integrated  $^1\text{H}^{\text{N}}$  intensity between  $\delta \approx 7$  to 11 ppm and fitting the curves with standard exponential equations using the program ‘t1guide’ within TopSpin 2.1 (Bruker BioSpin). (Bottom): Plot of rotational correlation time,  $\tau_c$  (ns), versus protein molecular weight (kDa) for known monomeric NESG targets (red) of ranging size (taking into account isotope enrichment as well as affinity tags in the sequence).  $^{15}\text{N}$   $T_1/T_2$  data for all monomeric proteins used for the  $\tau_c$  vs. MW plot were obtained at 25 °C, and analyzed as described above. For each protein, the  $\tau_c$  was calculated from the  $^{15}\text{N}$   $T_1/T_2$  ratio using the following approximation of literature relaxation equations<sup>31,32</sup>:

$$\text{Eq. 1} \quad \tau_c \approx \left( \sqrt{\frac{6T_1}{T_2} - 7} \right) / 4\pi\nu_N$$

where  $\nu_N$  is the frequency of  $^{15}\text{N}$  in Hz. The Aha1  $\tau_c$  value point matches the approximate value for dimeric MW, confirming the dimer association in solution. The  $^{15}\text{N}$   $T_1$ ,  $^{15}\text{N}$   $T_2$ , and  $\tau_c$  for Aha1 are 1.9 sec, 39 ms and 17.0 ns, respectively.

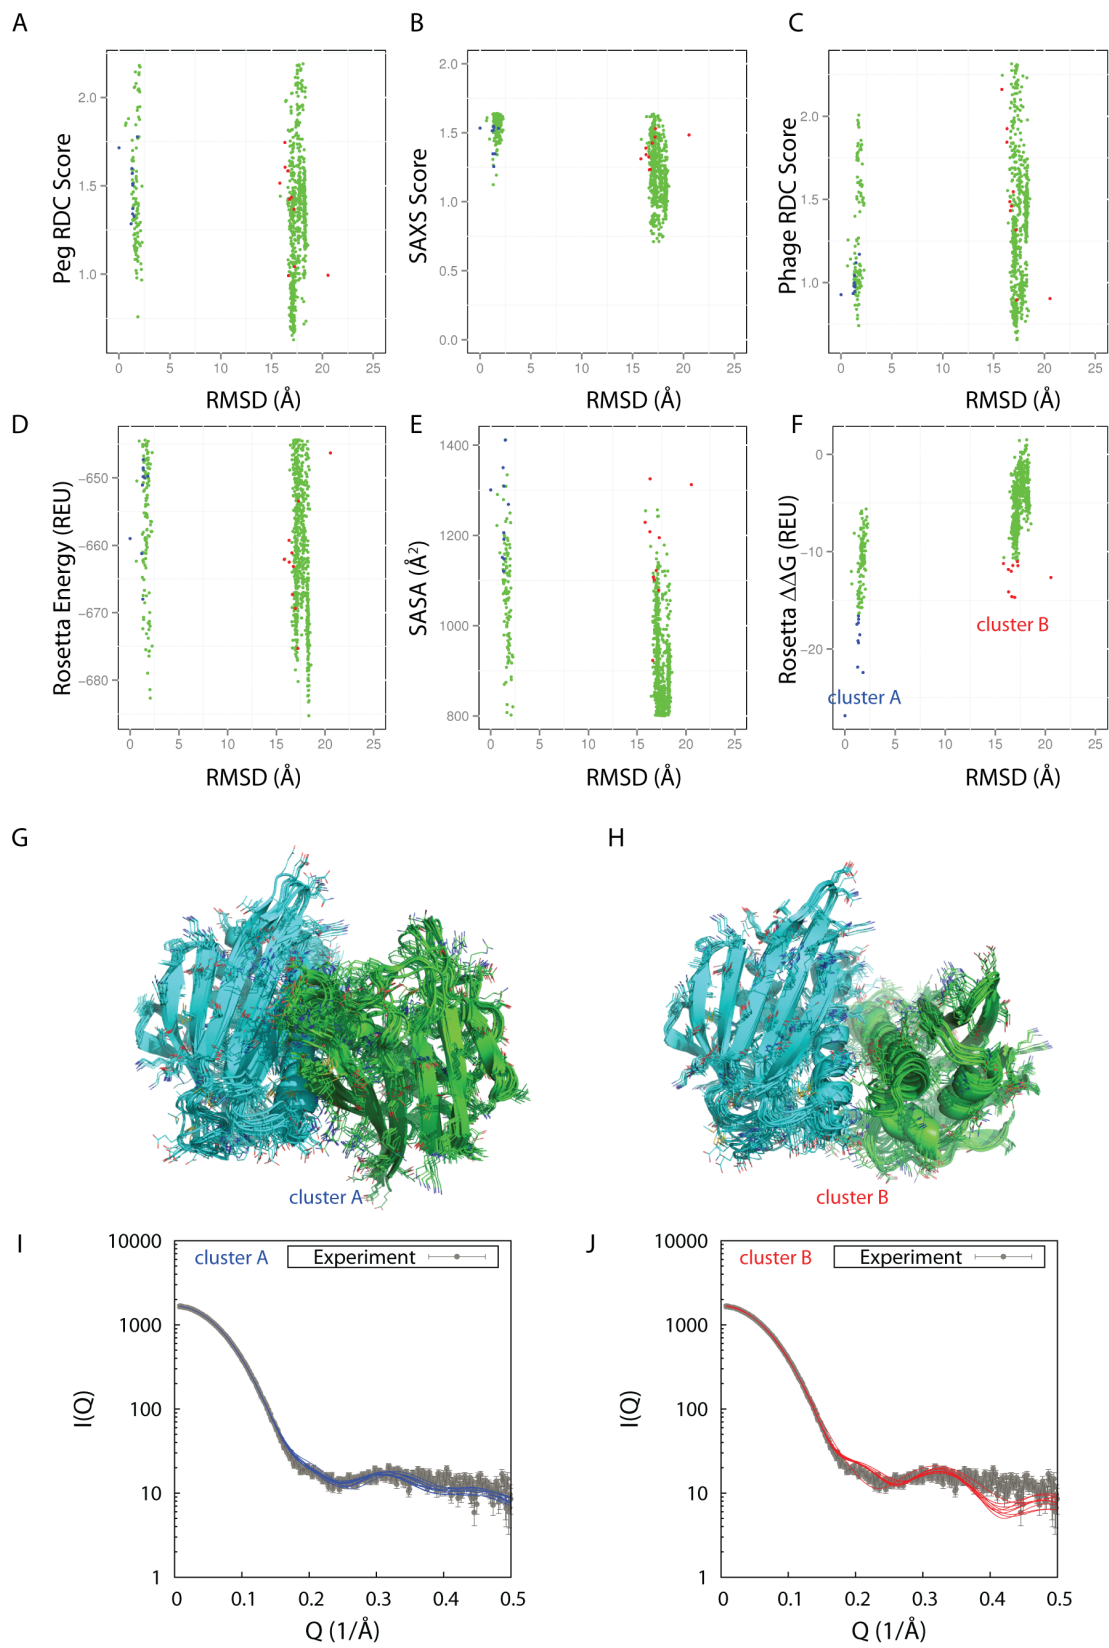



**Figure S8. Comparison of alternative Phase II dimer conformations.**

Experimental data score terms, structure quality terms and Rosetta energies vs. RMSD plot for all models generated in the Phase II/local refinement calculations after filtering (900 conformations – green points). As a reference structure, we used the model with the lowest interface interaction score (1<sup>st</sup> model in the submitted PDB ensemble, residues 1-131). The 10 conformations with lowest predicted  $\Delta\Delta G$  values were selected as the final ensemble (“cluster A”- blue points), while an alternative cluster of conformations is further highlighted in the plots (“cluster B”). In detail: **A**) Peg RDC score computed as  $\text{RMS}(\text{DEXP-DCALC}) / \text{DA}$ , where DA is the alignment tensor magnitude. **B**) SAXS score:  $\text{RMS}(\text{IEXP-ICALC})$ . **C**) Phage RDC scores. **D**) Rosetta score12 all-atom energy (in Rosetta Energy Units) **E**) SASA ( $\text{\AA}^2$ ). **F**) Interface free energy (ddg or  $\Delta\Delta G$ ) defined as:  $\Delta G_{\text{dimer}} - 2 * \Delta G_{\text{monomer}}$ . **G**) Structural superposition of the 10-dimer conformations in cluster A, also the final ensemble. **H**) Structure superposition of the 10-lowest  $\Delta\Delta G$  structures in cluster B. Overlay of SAXS profiles computed independently for each member in cluster A (**I**) and cluster B (**J**) alongside the experimental profile (grey).

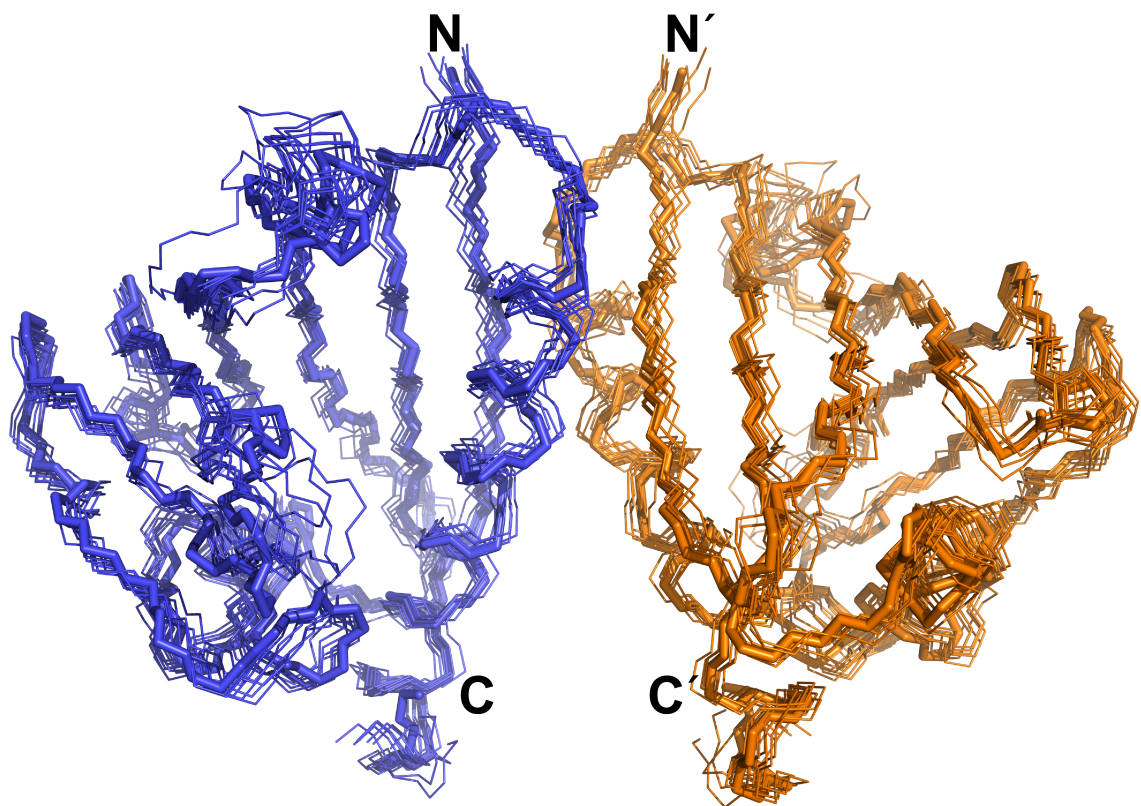

**Figure S9. Final hybrid structural ensemble.**

Final Rosetta ensemble of the *C. psychrerythraea* Aha1 dimer (PDB ID 2M89), computed using the sparse intra-residue NOEs, RDCs and SAXS data. The two subunits are colored blue and orange and the location of C-termini are labeled. An average value of 0.6 Å backbone RMSD was computed relative to the 1<sup>st</sup> structure for the ordered region, res. 1-134 (chain A and B), indicating a highly converged ensemble.

## References

1. Acton TB, Xiao R, Anderson S, Aramini J, Buchwald WA, Ciccocanti C, Conover K, Everett J, Hamilton K, Huang YJ, Janjua H, Kornhaber G, Lau J, Lee DY, Liu G, Maglaqui M, Ma L, Mao L, Patel D, Rossi P, Sahdev S, Shastry R, Swapna GV, Tang Y, Tong S, Wang D, Wang H, Zhao L, Montelione GT. Preparation of protein samples for NMR structure, function, and small-molecule screening studies. *Methods Enzymol* 2011;493:21-60.
2. Goto NK, Gardner KH, Mueller GA, Willis RC, Kay LE. A robust and cost-effective method for the production of Val, Leu, Ile ( $\delta$  1) methyl-protonated  $^{15}\text{N}$ -,  $^{13}\text{C}$ -,  $^2\text{H}$ -labeled proteins. *J Biomol NMR* 1999;13(4):369-374.
3. Jansson M, Li YC, Jendeborg L, Anderson S, Montelione BT, Nilsson B. High-level production of uniformly  $^{15}\text{N}$ - and  $^{13}\text{C}$ -enriched fusion proteins in *Escherichia coli*. *J Biomol NMR* 1996;7(2):131-141.
4. Hansen MR, Mueller L, Pardi A. Tunable alignment of macromolecules by filamentous phage yields dipolar coupling interactions. *Nat Struct Biol* 1998;5(12):1065-1074.
5. Ruckert M, Otting G. Alignment of Biological Macromolecules in Novel Nonionic Liquid Crystalline Media for NMR Experiments. *J Am Chem Soc* 2000;122(32):7793-7797.
6. Delaglio F, Grzesiek S, Vuister GW, Zhu G, Pfeifer J, Bax A. NMRPipe: a multidimensional spectral processing system based on UNIX pipes. *J Biomol NMR* 1995;6(3):277-293.
7. Goddard TD, Kneller DG. SPARKY 3: University of California, San Francisco; 2006.
8. Shen Y, Delaglio F, Cornilescu G, Bax A. TALOS+: a hybrid method for predicting protein backbone torsion angles from NMR chemical shifts. *J Biomol NMR* 2009;44(4):213-223.
9. Lange OF, Baker D. Resolution-adapted recombination of structural features significantly improves sampling in restraint-guided structure calculation. *Proteins* 2012;80(3):884-895.
10. Liu G, Shen Y, Atreya HS, Parish D, Shao Y, Sukumaran DK, Xiao R, Yee A, Lemak A, Bhattacharya A, Acton TA, Arrowsmith CH, Montelione GT, Szyperski T. NMR data collection and analysis protocol for high-throughput

- protein structure determination. *Proc Natl Acad Sci U S A* 2005;102(30):10487-10492.
11. Neri D, Szyperski T, Otting G, Senn H, Wüthrich K. Stereospecific nuclear magnetic resonance assignments of the methyl groups of valine and leucine in the DNA-binding domain of the 434 repressor by biosynthetically directed fractional <sup>13</sup>C labeling. *Biochemistry* 1989;28(19):7510-7516.
  12. Farrow NA, Muhandiram R, Singer AU, Pascal SM, Kay CM, Gish G, Shoelson SE, Pawson T, Forman-Kay JD, Kay LE. Backbone dynamics of a free and phosphopeptide-complexed Src homology 2 domain studied by <sup>15</sup>N NMR relaxation. *Biochemistry* 1994;33(19):5984-6003.
  13. Guntert P. Automated NMR structure calculation with CYANA. *Methods Mol Biol* 2004;278:353-378.
  14. Zwahlen C, Legault P, Vincent SJ, Greenblatt J, Konrat R, Kay LE. Methods for Measurement of Intermolecular NOEs by Multinuclear NMR Spectroscopy: Application to a Bacteriophage  $\lambda$  N-Peptide/boxB RNA Complex. *J Am Chem Soc* 1997;119:6711-6721.
  15. Tjandra N, Grzesiek S, Bax A. Magnetic Field Dependence of Nitrogen,  $\alpha$ -Proton J Splittings in <sup>15</sup>N-Enriched Human Ubiquitin Resulting from Relaxation Interference and Residual Dipolar Coupling. *J Am Chem Soc* 1996;118(26):6264-6272.
  16. Sass HJ, Musco G, Stahl SJ, Wingfield PT, Grzesiek S. An easy way to include weak alignment constraints into NMR structure calculations. *J Biomol NMR* 2001;21(3):275-280.
  17. Loquet A, Sgourakis NG, Gupta R, Giller K, Riedel D, Goosmann C, Griesinger C, Kolbe M, Baker D, Becker S, Lange A. Atomic model of the type III secretion system needle (vol 486, pg 276, 2012). *Nature* 2012;488(7413).
  18. Leaver-Fay A, Tyka M, Lewis SM, Lange OF, Thompson J, Jacak R, Kaufman K, Renfrew PD, Smith CA, Sheffler W, Davis IW, Cooper S, Treuille A, Mandell DJ, Richter F, Ban YE, Fleishman SJ, Corn JE, Kim DE, Lyskov S, Berrondo M, Mentzer S, Popovic Z, Havranek JJ, Karanicolas J, Das R, Meiler J, Kortemme T, Gray JJ, Kuhlman B, Baker D, Bradley P. ROSETTA3: an object-oriented software suite for the simulation and design of macromolecules. *Methods Enzymol* 2011;487:545-574.
  19. Clore GM, Gronenborn AM, Bax A. A robust method for determining the magnitude of the fully asymmetric alignment tensor of oriented macromolecules in the absence of structural information. *J Magn Reson* 1998;133(1):216-221.

20. Sgourakis NG, Lange OF, DiMaio F, Andre I, Fitzkee NC, Rossi P, Montelione GT, Bax A, Baker D. Determination of the structures of symmetric protein oligomers from NMR chemical shifts and residual dipolar couplings. *J Am Chem Soc* 2011;133(16):6288-6298.
21. Bhattacharya A, Tejero R, Montelione GT. Evaluating protein structures determined by structural genomics consortia. *Proteins* 2007;66(4):778-795.
22. Zweckstetter M. NMR: prediction of molecular alignment from structure using the PALES software. *Nat Protoc* 2008;3(4):679-690.
23. Smolksy IL, Liu P, Niebuhr M, Ito K, Weiss TM, Tsuruta H. Biological small-angle x-ray scattering facility at the Stanford synchrotron radiation laboratory. *J Appl Crystallogr* 2007;40:S453-S458.
24. Konarev PV, Volkov VV, Sokolova AV, Koch MHJ, Svergun DI. PRIMUS: a Windows PC-based system for small-angle scattering data analysis. *J Appl Crystallogr* 2003;36:1277-1282.
25. Svergun DI, Barberato C, Koch MH. CRY SOL - a program to evaluate X-ray Solution Scattering of Biological Macromolecules from Atomic Coordinates. *J Appl Crystallogr* 1995;28:768-773.
26. Laue TM, Shah BD, Ridgeway TM, Pelletier SL. Computer-aided interpretation of analytical sedimentation data for proteins. In: S.E. Harding AJR, J.C. Horton, editor. *Analytical Ultracentrifugation in Biochemistry and Polymer Science*. Cambridge, United kingdom: J R Soc Chem; 1992. p 90–125.
27. Vistica J, Dam J, Balbo A, Yikilmaz E, Mariuzza RA, Rouault TA, Schuck P. Sedimentation equilibrium analysis of protein interactions with global implicit mass conservation constraints and systematic noise decomposition. *Anal Biochem* 2004;326(2):234-256.
28. Johnson ML, Straume M. Comments on the analysis of sedimentation equilibrium experiments. In: Schuster TM, Laue TM, editors. *Modern Analytical Ultracentrifugation*. Boston, MA: Birkhäuser; 1994. p 37-65.
29. Moseley HN, Sahota G, Montelione GT. Assignment validation software suite for the evaluation and presentation of protein resonance assignment data. *J Biomol NMR* 2004;28(4):341-355.
30. Cornilescu GM, J. L.; Ottiger, M.; Bax, A. Validation of Protein Structure from Anisotropic Carbonyl Chemical Shifts in a Dilute Liquid Crystalline Phase. *J Am Chem Soc* 1998;120:6836-6837.

31. Kay LE, Torchia DA, Bax A. Backbone dynamics of proteins as studied by  $^{15}\text{N}$  inverse detected heteronuclear NMR spectroscopy: application to staphylococcal nuclease. *Biochemistry* 1989;28(23):8972-8979.
32. Fushman D, Ohlenschlager O, Ruterjans H. Determination of the backbone mobility of ribonuclease T1 and its 2'GMP complex using molecular dynamics simulations and NMR relaxation data. *J Biomol Struct Dyn* 1994;11(6):1377-1402.
